# Supplementary material
Source: PubMed Central journal article supplement (PMC6600923)
Supplement: pnas.1809920116.sapp.pdf [file pnas.1809920116.sapp.pdf]

## Supplementary Information

1  
2  
3  
4  
5  
6  
7  
8  
9  
10  
11  
12  
13  
14  
15  
16  
17  
18  
19  
20  
21  
22  
23  
24*Participants*

Facebook advertisements targeted men who indicated they were interested in men or, for the recruitment of heterosexual men, men who indicated they were interested in women. Only those 18 years of age and older were targeted, and the advertisements were presented only to those who spoke English. The locations selected included countries in which English is a first language (i.e., Australia, Canada, New Zealand, United Kingdom, and United States). At the Toronto Pride Festival, we offered festival attendees a business card with the survey's website, and/or recorded prospective participants' email addresses and then sent them the survey website address at a later date. We emailed details regarding how to complete our online questionnaire to 459 people from the Toronto Pride Festival, and our Facebook advertisements were shown to 56,155 people. Our online survey, hosted on Qualtrics, was completed by 1035 people. Only individuals who indicated that they were assigned male at birth were included in the study, and thus 208 participants were excluded because they reported being assigned as female at birth or did not indicate their sex at birth. Of the 827 participants, 82 were recruited via the Pride festival, and all others were recruited via Facebook advertisements; 736 of these participants specified their age ( $M = 32.96$ ,  $SD = 14.38$ ). Also, 717 participants indicated their ethnicity as White, 7 Black, 31 Asian, 7 Aboriginal, 13 Latin American, 1 Arab, 42 indicated other, and 4 declined to answer. The study was approved and conducted in accordance with the guidelines of the University of Toronto's research ethics board, and informed consent was obtained from all participants.

*Measures*

The *Recalled Childhood Gender Identity/Gender Role Questionnaire* (RCGI) measured childhood gender nonconformity. This 23-item questionnaire is scored such that high scores are male-typical, whereas low scores are gender-nonconforming. We present the data for a subset of this scale (the mean of 18 items belonging to factor 1 as described in (1)). This scale included questions such as

25 “As a child, my best or closest friend was 1-always a boy”, to “5-always a girl”, and “In fantasy or  
26 pretend play, I took the role 1-only of boys or men”, to “5-only of girls or women”. The internal  
27 consistency of this scale was evaluated using Cronbach’s alpha,  $\alpha = .74$ .

28 The short form, 30-item, *Bem Sex-Role Inventory* was administered to participants (2, 3). They  
29 were asked to indicate on a seven-point Likert scale how much they personally have each  
30 characteristic: 1- never or almost never true to 7- Always or almost always true. The 10 feminine items  
31 were added to obtain a Bem femininity score ( $\alpha = .88$ ), and the 10 masculine items were added to  
32 obtain a Bem masculinity score ( $\alpha = .84$ ; neutral items were not included in the analyses).

33 *Masculine and feminine occupational preferences* were measured as previously described (4,  
34 5). On a seven-point Likert scale, participants indicated whether they would 1- strongly dislike to 7-  
35 strongly like, male- and female-typical occupations. Responses were added for masculine occupations  
36 and feminine occupations separately. A higher score on the masculine occupational preference  
37 indicates male-typicality ( $\alpha = .84$ ); a higher score on the feminine scale indicates female-typicality ( $\alpha =$   
38  $.69$ ).

39 The *Big Five personality traits* were measured using a 10-item short form of the Big Five  
40 Personality Inventory, as previously described (6). Two items were presented for each of the  
41 personality traits, and added together to form a score on openness, conscientiousness, extroversion,  
42 neuroticism, and agreeableness. Participants were asked to indicate on a five-point Likert scale how  
43 well each of the 10 statements described their personality (e.g., “I see myself as someone who... is  
44 reserved”). Spearman-Brown was used to calculate the internal reliability for these 2-item scales; low  
45 to moderate internal reliability was found for the following measures: openness  $r_{kk} = .08$ , neuroticism  $r_{kk}$   
46  $= .56$ , conscientiousness  $r_{kk} = .37$ , extroversion  $r_{kk} = .64$  and agreeableness  $r_{kk} = .35$ .

47

48 *Age*

49 No differences were found between latent profiles on age,  $\chi^2(3, 736) = 3.822, p = .281$ .

50 Similarly, no sexual orientation differences were found on age: identity:  $U = 25553, p = .273$ ;

51 attraction:  $U = 19562, p = .153$ ; behavior:  $U = 21833, p = .073$ .

52

53 *Sexual Orientation*

54 Due to the small number of self-identified bisexual individuals and individuals who identified  
 55 their attraction/behavior between 1-3 on the Likert scale (i.e., not exclusively heterosexual, some  
 56 attraction and/or sexual experience with the same-sex), we examined whether it would be appropriate  
 57 to collapse these groups for our analyses. To do so, we evaluated whether there was a difference in the  
 58 distribution of gay and other nonheterosexual individuals across latent profiles. Using a Kruskal-Wallis  
 59 test, we found that those who self-identified as bisexual ( $n = 19$ ) or other nonheterosexual ( $n = 11$ ;  
 60 other nonheterosexual self-identified labels included: queer ( $n = 3$ ), queer/gay ( $n = 2$ ), homoflexible ( $n$   
 61  $= 1$ ), attraction to transgender women ( $n = 1$ ), bicurious ( $n = 2$ ), heterosexual with small attraction to  
 62 men ( $n = 1$ ) or bisexual but homoromantic ( $n = 1$ )) did not significantly differ from self-identified gay  
 63 men on the distribution across profiles,  $H(3, 417) = 1.11, p = .57$ . Similarly, those who indicated an  
 64 attraction or sexual experience as 1-3 on the Likert scale did not differ in the distribution across latent  
 65 profiles,  $H(9, 432) = 2.84, p = .418$  and  $H(9, 400) = 3.12, p = .374$ , respectively. These findings  
 66 suggest that these intermediate sexual orientations were similarly distributed across profiles compared  
 67 to gay men. Therefore, for all analyses, we compared heterosexual to nonheterosexual (gay or other  
 68 nonheterosexual) individuals.

69

70 *Correlations Between Biomarkers*

71 Pearson's correlations were conducted to further assess whether a relationship exists between  
 72 the 3 biomarkers: No significant correlations were found (see Table S2) in the full sample, or when

73 assessing correlations in the heterosexual or nonheterosexual sample only (see Table S2). These  
74 findings further support the findings from the LPA, such that the biomarkers examined rarely overlap  
75 within individuals.

76

#### 77 *Missing Values Analysis*

78 Latent profile analysis has the advantage of full-information maximum likelihood methods,  
79 which makes it robust against missing data (7); however, to ensure data were missing at random, we  
80 conducted a missing values analysis (see Table S3 for missing values by measure and latent profile).  
81 The missing values analysis using the EM method indicated the data were missing completely at  
82 random (MCAR), Little's MCAR  $\chi^2(385, N = 827) = 382.69, p = .52$ .

83

#### 84 *Missing Data*

85 Missing data were included in the LPA analyses (see Table S3). We used full information  
86 maximum likelihood (FIML) to handle missing data in our LPA analyses. FIML is the preferred  
87 method for data that are missing at random (MAR) or data missing completely at random (MCAR; 8-  
88 10). To assess whether data were MAR/MCAR, we conducted Little MCAR's test – this test was non-  
89 significant suggesting that the data were MCAR (see Table S3). To further assess whether data were  
90 MAR/MCAR, we conducted complete case analysis, and re-ran the LPA analyses; 2 out of 3 of the  
91 biomarker subgroups were extracted (i.e., the handedness and familiarity subgroups were delineated,  
92 but the FBO group was not; see Table S4). This indicates that our data are not MCAR (*note*: MCAR is  
93 rare, and has been argued to not be tenable in practice; see 10, 11). To confirm data are MAR, we  
94 compared those participants with missing familiarity data to those with familiarity data on the  
95 biomarkers FBO and handedness (i.e., familiarity had the highest rates of missing data, and as such we  
96 conducted these analyses to confirm that missing data for this variable did not have a relationship to the  
97 other two biomarkers). Results indicated that there were no differences on handedness or FBO between

98 participants with vs. without familiarity data,  $t(824) = -.577, p = .564$  and  $t(598) = .422, p = .673$ ,  
99 respectively; these findings support our conclusion that our data are MAR and support the use of FIML  
100 in the LPA analyses.

101  
102 *Non-Normality of Biomarkers*

103  
104       The data for handedness, familiarity and older brothers are skewed as might be expected given  
105 the relative low frequencies of these biomarkers in the population (i.e., especially rates of left-  
106 handedness and nonheterosexual male relatives; see SI Appendix A). While LPA can generally handle  
107 non-normal data (e.g., 12-14), modeling with the skew-t distribution analysis in Mplus can ensure  
108 meaningful subgroups are defined by the true structural differences in the latent profiles, thus  
109 eliminating the possibility of spurious profile formation due to the skewness of the data (15). As such,  
110 we conducted further LPA analyses with the skew-t distribution function. We found identical profile  
111 formation with this analysis, such that the distribution of participants was *identical* across latent  
112 profiles with the skew-t distribution analysis, and thus all means, SD and all statistical comparisons  
113 remain the same (See Table S5). This analysis further supports the meaningfulness of the latent profiles  
114 identified in the current study.

115

116 *Are Heterosexual and Nonheterosexual Men From Profile 3 Indistinguishable on Developmental*  
117 *Markers?*

118       A large proportion of nonheterosexual men, regardless of whether sexual orientation was  
119 defined by self-identification, attraction or behavior, were grouped with the majority of heterosexual  
120 men in Profile 1 – the profile that did not present elevations on any bio-developmental markers. We  
121 questioned whether heterosexual men and nonheterosexual men from Profile 1 were truly  
122 indistinguishable from each other on the developmental markers. Therefore, we evaluated whether  
123 heterosexual men (strictly heterosexual on identity, attraction and behavior) and nonheterosexual men

124 from Profile 1 differed on the developmental markers. Nonheterosexual men were indistinguishable  
125 from heterosexual men in Profile 1 on measures of handedness,  $U = 14674.5$ ,  $p = .32$ , fraternal birth  
126 order,  $U = 15150$ ,  $p = .95$ , and familiarity,  $U = 4947.5$ ,  $p = .80$ , (see Table S6).

127

### 128 *Subgroups of Nonheterosexual Men Differ From Heterosexual Men on Developmental Markers*

129 We compared the 4 profiles with only nonheterosexual men to the entire heterosexual male  
130 sample on developmental markers to test whether differences on developmental markers and  
131 personality traits persisted when only nonheterosexual men were in the subgroups (see Table S7). For  
132 these analyses, we used Kruskal-Wallis with posthoc Mann-Whitney tests. Significant omnibus effects  
133 were found for all developmental markers, including handedness,  $H(4, 580) = 158.54$ ,  $p < .001$ ,  
134 fraternal birth order,  $H(4, 574) = 208.78$ ,  $p < .001$ , and familiarity,  $H(4, 334) = 41.23$ ,  $p < .001$ .

135 Compared to heterosexual men, Profile 1 nonheterosexual men were more right-handed and  
136 reported a lower proportion of older brothers. Profile 2 nonheterosexual men reported a higher  
137 proportion of older brothers compared to heterosexual men. Profile 3 nonheterosexual men were  
138 significantly more non-right handed compared to heterosexual men. Profile 4 nonheterosexual men  
139 were significantly more non-right-handed and had greater proportions of gay/bisexual male relatives in  
140 their family compared to heterosexual men.

141

### 142 *Latent Profiles Composed of Only Nonheterosexual Men Differ on Developmental Markers*

143 With heterosexual men removed from Profiles 1-4, differences on developmental markers  
144 persisted between latent profiles (Table S7). For example, Profile 1 nonheterosexual men continued to  
145 display low levels of all developmental markers, and were even lower compared to heterosexual men  
146 on handedness and proportion of older brothers. Specifically, Profile 1 nonheterosexual men were  
147 significantly more right-handed compared to Profile 3, Profile 4 and heterosexual men, but did not  
148 differ from Profile 2. Profile 1 nonheterosexual men reported significantly fewer older brothers

149 compared to Profile 2, Profile 3 and heterosexual men, but did not differ from Profile 4. Profile 1  
150 nonheterosexual men reported fewer gay/bisexual men in their family compared to Profile 4, but did  
151 not differ from heterosexual men or any other profile on this measure.

152

### 153 *Latent Profiles with Only Nonheterosexual Men Differ From Heterosexual Men on Personality Traits*

154 We evaluated whether Profile 1 through 4 nonheterosexual men differed from all heterosexual  
155 men on personality traits (see Table S8). Significant omnibus effects were found for the following  
156 personality variables: RCGI scale,  $H(4, 549) = 154.01, p < .001$ , female occupational preferences,  $H$   
157  $(4, 572) = 38.6, p < .001$ , male occupational preferences,  $H(4, 572) = 51.25, p < .001$ , neuroticism,  $H$   
158  $(4, 569) = 14.82, p = .005$ , and openness,  $H(4, 570) = 12.77, p = .012$ .

159 Heterosexual men were more gender-conforming compared to gay men from all profiles:

160 Heterosexual men scored more male-typical on the RCGI, female occupational preferences, and male  
161 occupational preferences scales compared to nonheterosexual men from Profile 1. Heterosexual men  
162 scored lower on neuroticism and openness compared to Profile 1 nonheterosexual men. Heterosexual  
163 men also scored lower on neuroticism compared to Profile 2 nonheterosexual men. Heterosexual men  
164 scored more male-typical on the RCGI, female occupational preferences, and male occupational  
165 preferences scales compared to Profile 3 nonheterosexual men. Similarly, heterosexual men were male-  
166 typical on the RCGI scale and female occupational preferences compared to Profile 4.

167

### 168 *Subgroups of Nonheterosexual Men Differ from Each other on Personality Traits*

169 Profiles 1 and 4 nonheterosexual men scored significantly more male-typical on the male  
170 occupational preference assessment compared to Profile 3 nonheterosexual men. Compared to Profile  
171 2, Profile 3 nonheterosexual men were significantly more male-typical on the Bem femininity scale, but  
172 less male-typical on the male occupational preference scale. Profile 1 nonheterosexual men scored  
173 significantly more male-typical on the Bem femininity scale compared to Profile 2 nonheterosexual

174 men. Together, results suggest that Profile 1 nonheterosexual men are the most gender-conforming,  
175 whereas nonheterosexual men from other profiles differ in their degree of conformity depending on the  
176 scale. On the Big-Five personality inventory, Profile 2 nonheterosexual men scored higher on  
177 agreeableness compared to both Profile 3 and 4 nonheterosexual men. No other significant differences  
178 between nonheterosexual men by profile were found.

179

### 180 *Profile Comparisons with Exclusively Heterosexual and Gay Men*

181 To assess whether patterns would be consistent without bisexual/low same-sex oriented men  
182 included in the analyses, we evaluated whether latent profile differences would persist when comparing  
183 exclusively heterosexual men (i.e., self-identified heterosexual, only attracted to and sexual experience  
184 with women) and exclusively gay men (i.e., self-identified as gay, only attracted to and sexual  
185 experience with men; see Table S9). Briefly, the four profiles with exclusively heterosexual and gay  
186 men continued to differ on developmental measures and many of the same personality traits: fraternal  
187 birth order,  $H(501) = 243.13, p < .001$ , familiarity,  $H(284) = 40.88, p < .001$ , handedness,  $H(507) =$   
188  $161.52, p < .001$ , RCGI,  $H(483) = 10.30, p = .02$ , Bem femininity,  $H(500) = 12.05, p = .007$ , and  
189 agreeableness,  $H(499) = 10.26, p = .016$ . Together, these findings further support our decision to  
190 include other nonheterosexual men with gay men for all major comparisons.

191

### 192 *The Fraternal Birth Order Effect by Latent Profiles Compared to the Expected Population Mean*

193 Statistically, we found that Profiles 2, 3 and 4 all differed from Profile 1 in the proportion of  
194 older brothers, suggesting that Profiles 2, 3 and 4 were all affected by mechanisms underlying the  
195 fraternal birth order effect. In order to test whether this was accurate, we compared all profiles to the  
196 expected population value for proportion of older brothers (i.e., 0.25) using one-sample  $t$ -tests. Results  
197 revealed that only Profile 2 had a significantly higher proportion of older brothers compared to the  
198 expected population value,  $t(116) = 35.893, p < .001$ . Conversely, Profile 1 had a significantly lower



199 proportion of older brothers compared to the hypothetical mean,  $t(400) = -14.126, p < .001$ . These  
200 results held true when heterosexual men were removed from the four profiles, such that only Profile 2  
201 nonheterosexual men showed a significantly higher proportion of older brothers,  $t(91) = 32.568, p <$   
202  $.001$ , whereas Profile 1 nonheterosexual men had a significantly lower proportion older brothers,  $t(273)$   
203  $= -11.640, p < .001$ , compared to the hypothetical mean. Although heterosexual samples are small for  
204 Profiles 2, 3 and 4, and thus should be interpreted with caution, our findings indicate that heterosexual  
205 men from Profile 2 also have a significantly higher proportion of older brothers,  $t(24) = 15.113, p <$   
206  $.001$ , and Profile 1 heterosexual men also have a lower proportion of older brothers,  $t(103) = -8.179, p$   
207  $< .001$ , compared to the expected population mean.

208

## 209 References

- 210 1. Zucker KJ, et al. (2006) The recalled childhood gender identity/gender role  
211 questionnaire: Psychometric properties. *Sex Roles* 54(7-8):469-483.
- 212 2. Bem SL (1974) The measurement of psychological androgyny. *J Consult Clin Psychol*  
213 42(2):155-162.
- 214 3. Cullen JM, Wright Jr LW, Alessandri M (2002) The personality variable openness to  
215 experience as it relates to homophobia. *J of Homosexuality* 42(4):119-134.
- 216 4. Lippa R (1998) Gender-related individual differences and the structure of vocational interests:  
217 the importance of the people-things dimension. *J Pers Soc Psychol* 74(4):996-1009.
- 218 5. Lippa RA (2010) Gender differences in personality and interests: When, where, and why? *Soc*  
219 *Personal Psychol Compass* 4(11):1098-1110.
- 220 6. Rammstedt B, John OP (2007) Measuring personality in one minute or less: A 10-item short  
221 version of the Big Five Inventory in English and German. *J Res Pers* 41(1):203-212.
- 222 7. Little RJA, Rubin DB (2014) *Statistical analysis with missing data*. (John Wiley & Sons).
- 223 8. Dong Y, Peng CYJ (2012) Principled missing data methods for researchers. *Springer Plus*  
224 2(1):222.
- 225 9. Enders CK (2010) *Applied missing data analysis* (Gildford Press).
- 226 10. Enders CK, Bandalos DL (2001) The relative performance of full information maximum  
227 likelihood estimation for missing data in structural equation models. *Struct Equ Modeling*  
228 8(3):430-457.
- 229 11. Muthén B, Kaplan D, Hollis M (1987) On structural equation modeling with data that are not  
230 missing completely at random. *Psychometrika* 52:431-462.
- 231 12. Collins LM, Lanza S T (2010) *Latent class and latent transition analysis: With applications in*  
232 *the social, behavioral, and health sciences* (John Wiley & Sons).
- 233 13. Muthén, BO (2001) Latent variable mixture modeling. In *New developments and techniques in*  
234 *structural equation modeling* (Psychology Press).
- 235 14. Oberski, D (2016) Mixture models: Latent profile and latent class analysis. In *Modern*  
236 *statistical methods for HCI* (Springer, Cham).
- 237 15. Asparouhov T, Muthén B (2016) Structural equation models and mixture models with  
238 continuous nonnormal skewed distributions. *Struct Equ Modeling* 23(1):1-19.

240

241 Table S1. Model Fit Indices for Latent Profile Analyses.

| Solution          | BIC            | BLRT<br><i>p</i> -value | Entropy    | Profile sizes                                                                                              |
|-------------------|----------------|-------------------------|------------|------------------------------------------------------------------------------------------------------------|
| 1 Profile         | 5030.64        | -                       | -          | 100%                                                                                                       |
| 2 Profiles        | 4358.49        | <.001                   | .983       | Profile 1: 88.97%<br>Profile 2: 11.08%                                                                     |
| 3 Profiles        | 4181.38        | <.001                   | .945       | Profile 1: 84.66%<br>Profile 2: 10.2%<br>Profile 3: 5.14%                                                  |
| <b>4 Profiles</b> | <b>4068.80</b> | <b>&lt;.001</b>         | <b>.82</b> | <b>Profile 1: 71.1%</b><br><b>Profile 2: 14.15%</b><br><b>Profile 3: 10.28%</b><br><b>Profile 4: 4.47%</b> |
| 5 Profiles        | 3975.16        | .011                    | .84        | Profile 1: 61.77%<br>Profile 2: 22.87%<br>Profile 3: 7.47%<br>Profile 4: 5.28%<br>Profile 5: 2.61%         |

242 *Note: Bold indicates the best-fitting model. BIC = Bayesian information criterion; BLRT = bootstrap*  
 243 *likelihood ratio test.* BIC values steadily decreased as the number of profiles increased, indicating  
 244 better model fit with increased profiles. BLRT values are significant for all profiles, also suggesting  
 245 increased profiles represent a better model fit. However, profile sizes declined (i.e., profiles with less  
 246 than 3% of sample) for the 5-profile model, and therefore may not be stable. As such, the 4-profile  
 247 model was the best model fit for our data.

248

249

250 Table S2. Pearson Correlations Between Biomarkers for Full Sample, Heterosexual and  
 251 Nonheterosexual Men.

|                                                 |            | Handedness                             | Familiarity                            |
|-------------------------------------------------|------------|----------------------------------------|----------------------------------------|
| Full Sample<br>(N = 827)                        | FBO        | $r = .011$<br>$p = .79$<br>$n = 599$   | $r = -.019$<br>$p = .73$<br>$n = 332$  |
|                                                 | Handedness | -                                      | $r = .040$<br>$p = .465$<br>$n = 333$  |
| <b>Sexual Orientation (Self-Identification)</b> |            |                                        |                                        |
| Heterosexual<br>(n = 144)                       | FBO        | $r = -.017$<br>$p = .839$<br>$n = 141$ | $r = -.077$<br>$p = .496$<br>$n = 81$  |
|                                                 | Handedness | -                                      | $r = -.135$<br>$p = .225$<br>$n = 82$  |
| Nonheterosexual<br>(n = 437)                    | FBO        | $r = .010$<br>$p = .834$<br>$n = 432$  | $r = -.004$<br>$p = .956$<br>$n = 251$ |
|                                                 | Handedness | -                                      | $r = .094$<br>$p = .136$<br>$n = 251$  |

252

253

254 Table S3. Missing Values – number of participants who reported on the developmental markers and  
 255 outcome measures by profile.

| Variables                               | Profile 1 | Profile 2 | Profile 3 | Profile 4 | Total<br>(Total <i>N</i><br>= 827) |
|-----------------------------------------|-----------|-----------|-----------|-----------|------------------------------------|
| Handedness                              | 587       | 117       | 85        | 37        | 826                                |
| Proportion of Older<br>Brothers         | 401       | 117       | 54        | 28        | 600                                |
| Familiarity Total                       | 216       | 74        | 33        | 11        | 334                                |
| Maternal<br>Familiarity                 | 278       | 93        | 35        | 14        | 420                                |
| Paternal Familiarity                    | 249       | 81        | 41        | 15        | 386                                |
| RCGI                                    | 362       | 114       | 48        | 25        | 549                                |
| Bem Masculinity                         | 377       | 116       | 53        | 25        | 571                                |
| Bem Femininity                          | 377       | 116       | 53        | 25        | 571                                |
| Feminine<br>Occupational<br>Preference  | 378       | 116       | 53        | 25        | 572                                |
| Masculine<br>Occupational<br>Preference | 378       | 116       | 53        | 25        | 572                                |
| Extroversion                            | 377       | 114       | 53        | 25        | 569                                |
| Agreeableness                           | 378       | 114       | 53        | 25        | 570                                |
| Conscientiousness                       | 377       | 115       | 53        | 24        | 569                                |
| Neuroticism                             | 376       | 115       | 53        | 25        | 569                                |
| Openness                                | 377       | 115       | 53        | 25        | 570                                |

256 Note: Latent profile analysis has the advantage of full-information maximum likelihood methods for  
 257 missing data (Little & Rubin, 2014), and a missing values analysis indicated that the data for the  
 258 biomarkers (i.e., FBO, handedness and familiarity) as well as for all the outcome measures (i.e., RCGI  
 259 scale, Bem masculinity, Bem femininity, feminine occupational preferences, masculine occupational  
 260 preferences and the Big-Five measures) were missing completely at random (MCAR), Little's MCAR  
 261  $\chi^2(385, N = 827) = 382.69, p = .524$ .

262  
 263  
 264  
 265

266 Table S4. Model Fit Indices for Latent Profile Analyses with Complete Case Data.

| Solution   | BIC      | BLRT <i>p</i> -value | Entropy | Profile sizes                                                                                     |
|------------|----------|----------------------|---------|---------------------------------------------------------------------------------------------------|
| 1 Profile  | 2840.05  | -                    | -       | 100%                                                                                              |
| 2 Profiles | 2597.56  | <.001                | .989    | Profile 1: 90.03%<br>Profile 2: 9.97%                                                             |
| 3 Profiles | 2439.83  | <.001                | .986    | Profile 1: 86.91%<br>Profile 2: 9.64%<br>Profile 3: 3.44%                                         |
| 4 Profiles | 2334.982 | <.001                | .973    | Profile 1: 77.64%<br>Profile 2: 9.97%<br>Profile 3: 9.67%<br>Profile 4: 2.72%                     |
| 5 Profiles | 2266.15  | 0.294                | .983    | Profile 1: 76.81%<br>Profile 2: 10.86%<br>Profile 3: 9.32%<br>Profile 4: 2.42%<br>Profile 5: 0.6% |

267 *Note: BIC = Bayesian information criterion; BLRT = bootstrap likelihood ratio test.*

268

269

270

271

272

273

274

275

276

277

278

279

280

281 Table S5. Model Fit Indices for Latent Profile Analyses with Skew-t Distribution.

| Solution          | BIC            | BLRT $p$ -value | Entropy    | Profile sizes                                                                                              |
|-------------------|----------------|-----------------|------------|------------------------------------------------------------------------------------------------------------|
| 1 Profile         | 5030.69        | -               | -          | 100%                                                                                                       |
| 2 Profiles        | 4358.54        | <.001           | .983       | Profile 1: 88.97%<br>Profile 2: 11.08%                                                                     |
| 3 Profiles        | 4181.47        | <.001           | .945       | Profile 1: 84.66%<br>Profile 2: 10.2%<br>Profile 3: 5.14%                                                  |
| <b>4 Profiles</b> | <b>4068.88</b> | <b>&lt;.001</b> | <b>.82</b> | <b>Profile 1: 71.1%</b><br><b>Profile 2: 14.15%</b><br><b>Profile 3: 10.28%</b><br><b>Profile 4: 4.47%</b> |
| 5 Profiles        | 3975.24        | <.011           | .84        | Profile 1: 61.77%<br>Profile 2: 22.87%<br>Profile 3: 7.47%<br>Profile 4: 5.28%<br>Profile 5: 2.61%         |

282 *Note: Bold indicates the best-fitting model. BIC = Bayesian information criterion; BLRT = bootstrap*  
283 *likelihood ratio test.* BIC values steadily decreased as the number of profiles increased, indicating  
284 better model fit with increased profiles. BLRT values are significant for all profiles, also suggesting  
285 increased profiles represent a better model fit. However, profile sizes declined to less than 3% of  
286 sample size for the 5-profile model, and therefore may not be stable. As such, the 4-profile model was  
287 the best model fit for our data.

288

289

290

291

292 Table S6. Means and Standard Deviations for Indicator Variable by Sexual Orientation for Profile 1.  
 293

| Sexual Orientation:<br>Profile 1 | Handedness<br><i>M (SD)</i> | Fraternal Birth Order<br><i>M (SD)</i> | Familiarity<br><i>M (SD)</i> |
|----------------------------------|-----------------------------|----------------------------------------|------------------------------|
| Heterosexual                     | 0.099 (0.09)                | 0.169 (0.11)                           | 0.032 (0.06)                 |
| Nonheterosexual                  | 0.092 (0.09)                | 0.17 (0.11)                            | 0.037 (0.07)                 |

294  
 295  
 296  
 297  
 298  
 299  
 300  
 301  
 302  
 303  
 304  
 305  
 306  
 307  
 308  
 309  
 310  
 311  
 312  
 313



314 Table S7. Means and Standard Deviations for Indicator Variables by Latent Profile and Sexual  
 315 Orientation

|                                   | Handedness                      | Fraternal Birth Order           | Proportion of Gay/Bisexual Men |
|-----------------------------------|---------------------------------|---------------------------------|--------------------------------|
| Heterosexual Men                  | 0.154 (0.20) <sup>b,d,e</sup>   | 0.243 (0.20) <sup>b,c</sup>     | 0.041 (0.13) <sup>e</sup>      |
| Profile 1:<br>Nonheterosexual Men | 0.093 (0.09) <sup>a,d,e</sup>   | 0.173 (0.11) <sup>a,c,d</sup>   | 0.04 (0.07) <sup>e</sup>       |
| Profile 2:<br>Nonheterosexual Men | 0.175 (0.23) <sup>d,e</sup>     | 0.599 (0.10) <sup>a,b,d,e</sup> | 0.047 (0.09) <sup>e</sup>      |
| Profile 3:<br>Nonheterosexual Men | 0.789 (0.15) <sup>a,b,c,e</sup> | 0.302 (0.23) <sup>b,c</sup>     | 0.051 (0.08) <sup>e</sup>      |
| Profile 4:<br>Nonheterosexual Men | 0.361 (0.17) <sup>a,b,c,d</sup> | 0.223 (0.15) <sup>c</sup>       | 0.51 (0.13) <sup>a,b,c,d</sup> |

316 Note: 1) On the handedness scale, a score of zero represents strict right-hand use, whereas a score of 1  
 317 represents a strict use of the left-hand. 2) Due to similarities between self-identified, attraction and  
 318 behavior sexual orientation (see correlations Table 2, and SI “*Sexual Orientation*”), a composite  
 319 measure was formed for these comparisons. Participants who were consistently heterosexual across  
 320 self-identification, attraction and behavior were categorized as heterosexual, all others were categorized  
 321 as nonheterosexual men.

- 322  
 323 <sup>a</sup> Significantly different from heterosexual men,  $p < .05$ .  
 324 <sup>b</sup> Significantly different from Profile 1 nonheterosexual men,  $p < .05$ .  
 325 <sup>c</sup> Significantly different from Profile 2 nonheterosexual men,  $p < .05$ .  
 326 <sup>d</sup> Significantly different from Profile 3 nonheterosexual men,  $p < .05$ .  
 327 <sup>e</sup> Significantly different from Profile 4 nonheterosexual men,  $p < .05$ .

328  
 329

330 Table S8. Means and Standard Deviations for Outcome Variables for Heterosexual Men vs Latent  
 331 Profiles Consisting of Only Nonheterosexual Men

| Outcome Variables                 | Heterosexual men | Profile 1                      | Profile 2                      | Profile 3                          | Profile 4                 |
|-----------------------------------|------------------|--------------------------------|--------------------------------|------------------------------------|---------------------------|
| RCGI                              | 4.33 (0.34)      | 3.71 (0.60) <sup>a</sup>       | 3.64 (0.50) <sup>a</sup>       | 3.61 (0.53) <sup>a</sup>           | 3.48 (0.50) <sup>a</sup>  |
| Bem Masculinity                   | 48.78 (8.23)     | 48.9 (8.84)                    | 49.28(8.77)                    | 49.33 (7.87)                       | 49.56 (8.51)              |
| Bem Femininity                    | 52.78 (8.98)     | 53.39<br>(9.17) <sup>c</sup>   | 54.72<br>(8.09) <sup>a,d</sup> | 50.74<br>(9.92) <sup>c</sup>       | 52 (6.9)                  |
| Female Occupational Preference    | 15.65 (5.75)     | 18.76<br>(6.05) <sup>a</sup>   | 19.96<br>(5.51) <sup>a</sup>   | 18.87<br>(5.77) <sup>a</sup>       | 18.94 (5.01) <sup>a</sup> |
| Masculine Occupational Preference | 22.9 (6.9)       | 18.30<br>(7.26) <sup>a,d</sup> | 18.72<br>(6.88) <sup>a,d</sup> | 15.87<br>(7.39) <sup>a,c,b,e</sup> | 21.13 (5.8) <sup>d</sup>  |
| Extroversion                      | 6.12 (2.07)      | 6.46 (2.12)                    | 6.72 (2.06)                    | 6.69 (2.24)                        | 6.81 (2)                  |
| Agreeableness                     | 7.18 (1.68)      | 6.99 (1.7)                     | 7.26 (1.5) <sup>d,e</sup>      | 6.59 (1.69)                        | 6.5 (2) <sup>c</sup>      |
| Conscientiousness                 | 7.09 (1.69)      | 7.02 (1.65)                    | 7.37 (1.53)                    | 7.15 (1.39)                        | 7.06 (1.98)               |
| Neuroticism                       | 5.18 (2.17)      | 5.91 (2.13) <sup>a</sup>       | 6.09 (2) <sup>a</sup>          | 5.77 (2.15)                        | 6.62 (2)                  |
| Openness                          | 7.02 (1.63)      | 7.52 (1.79) <sup>a</sup>       | 7.17 (1.78)                    | 7.85 (1.83)                        | 7.13 (1.78)               |

332 Note: Due to similarities between self-identified, attraction and behavior sexual orientation (see  
 333 correlations Table 2, and SI “*Sexual Orientation*”), a composite measure was formed for these  
 334 comparisons. Participnats who were consistently heterosexual were categorized as heterosexual, all  
 335 others were categorized as nonheterosexual men.

336

337 <sup>a</sup> Significantly different from heterosexual men,  $p < .05$ .

338 <sup>b</sup> Significantly different from Profile 1 nonheterosexual men,  $p < .05$ .

339 <sup>c</sup> Significantly different from Profile 2 nonheterosexual men,  $p < .05$ .

340 <sup>d</sup> Significantly different from Profile 3 nonheterosexual men,  $p < .05$ .

341 <sup>e</sup> Significantly different from Profile 4 nonheterosexual men,  $p < .05$ .

342

343

344 Table S9. Exclusively Heterosexual and Gay Men Comparisons.

| Variables                         | Profile 1                  | Profile 2                    | Profile 3                    | Profile 4                    |
|-----------------------------------|----------------------------|------------------------------|------------------------------|------------------------------|
| Handedness                        | 0.09 (0.09) <sup>c,d</sup> | 0.12 (0.11) <sup>c,d</sup>   | 0.81 (0.15) <sup>a,b,d</sup> | 0.33 (0.18) <sup>a,b,c</sup> |
| Fraternal Birth Order             | 0.17 (0.11) <sup>b,c</sup> | 0.61 (0.1) <sup>a,c,d</sup>  | 0.27 (0.22) <sup>a,b</sup>   | 0.22 (0.13) <sup>b</sup>     |
| Familiarity                       | 0.04 (0.07) <sup>d</sup>   | 0.04 (0.09) <sup>d</sup>     | 0.05 (0.08) <sup>d</sup>     | 0.55 (0.19) <sup>a,b,c</sup> |
| RCGI                              | 3.88 (0.62) <sup>b,c</sup> | 3.76 (0.55) <sup>a</sup>     | 3.67 (0.59) <sup>a</sup>     | 3.77 (0.58)                  |
| Bem Masculinity                   | 48.6 (8.6)                 | 49.03 (8.58)                 | 50.17 (7.67)                 | 50.39 (9.26)                 |
| Bem Femininity                    | 52.94 (9.07) <sup>b</sup>  | 55.67 (8.1) <sup>a,c</sup>   | 50.59 (9.15) <sup>b</sup>    | 52.52 (8.85)                 |
| Feminine Occupational Preference  | 17.88 (6.19) <sup>b</sup>  | 19.28 (5.88) <sup>a</sup>    | 18.24 (6.17)                 | 18.22 (5.3)                  |
| Masculine Occupational Preference | 19.27 (7.55)               | 19.32 (6.55)                 | 17.37 (7.35) <sup>d</sup>    | 22.52 (7.67) <sup>c</sup>    |
| Extroversion                      | 6.34 (2.17)                | 6.48 (2.13)                  | 6.72 (2.12)                  | 6.65 (1.92)                  |
| Agreeableness                     | 7.09 (1.7) <sup>b</sup>    | 7.51 (1.57) <sup>a,c,d</sup> | 6.63 (1.72) <sup>b</sup>     | 6.83 (1.87) <sup>b</sup>     |
| Conscientiousness                 | 7.05 (1.67)                | 7.33 (1.56)                  | 7.39 (1.54)                  | 7.23 (1.82)                  |
| Neuroticism                       | 5.75 (2.17)                | 5.81 (2.13)                  | 5.52 (2.18)                  | 5.17 (2.25)                  |
| Openness                          | 7.32 (1.8)                 | 7.31 (1.75)                  | 7.74 (1.71)                  | 7.09 (1.86)                  |

345 <sup>a</sup> Significantly different from Profile 1 nonheterosexual men,  $p < .05$ .346 <sup>b</sup> Significantly different from Profile 2 nonheterosexual men,  $p < .05$ .347 <sup>c</sup> Significantly different from Profile 3 nonheterosexual men,  $p < .05$ .348 <sup>d</sup> Significantly different from Profile 4 nonheterosexual men,  $p < .05$ .

349

350

351 Table S10. Effect Sizes for Latent Profile Comparisons.

|                                         | Omnibus 4-<br>Profile<br>comparison<br>( $\eta_p^2$ ) | Profile 1<br>vs 2 ( <i>d</i> ) | Profile<br>1 vs 3<br>( <i>d</i> ) | Profile<br>1 vs 4<br>( <i>d</i> ) | Profile<br>2 vs 3<br>( <i>d</i> ) | Profile<br>2 vs 4<br>( <i>d</i> ) | Profile<br>3 vs 4<br>( <i>d</i> ) |
|-----------------------------------------|-------------------------------------------------------|--------------------------------|-----------------------------------|-----------------------------------|-----------------------------------|-----------------------------------|-----------------------------------|
| <b>Indicator Variables</b>              |                                                       |                                |                                   |                                   |                                   |                                   |                                   |
| Handedness                              | <b>0.35*</b>                                          | <b>0.32*</b>                   | <b>7.37*</b>                      | <b>2.96*</b>                      | <b>5.59*</b>                      | <b>2.07*</b>                      | <b>3.08*</b>                      |
| Older Brother                           | <b>0.46*</b>                                          | <b>3.91*</b>                   | <b>0.93*</b>                      | <b>0.54*</b>                      | <b>2.43*</b>                      | <b>3.24*</b>                      | 0.25                              |
| Familiarity                             | <b>0.14*</b>                                          | 0                              | 0.14                              | <b>6.60*</b>                      | 0.13                              | <b>5.34*</b>                      | <b>5.01*</b>                      |
| <b>Outcome Variables</b>                |                                                       |                                |                                   |                                   |                                   |                                   |                                   |
| RCGI scale                              | <b>0.012*</b>                                         | <b>0.17*</b>                   | <b>0.27*</b>                      | 0.28                              | 0.11                              | 0.13                              | 0.017                             |
| Bem Masculinity                         | <i>NS</i>                                             | 0.01                           | 0.14                              | 0.21                              | 0.16                              | 0.25                              | 0.11                              |
| Bem Femininity                          | <b>0.014*</b>                                         | <b>0.30*</b>                   | 0.31                              | 0.05                              | <b>0.58*</b>                      | 0.24                              | 0.33                              |
| Feminine<br>Occupational<br>Preference  | <i>NS</i>                                             | 0.26                           | 0.01                              | 0.14                              | 0.27                              | 0.12                              | 0.15                              |
| Masculine<br>Occupational<br>Preference | <b>0.009*</b>                                         | 0.004                          | <b>0.33*</b>                      | 0.38                              | 0.35                              | 0.43                              | <b>0.70*</b>                      |
| Extroversion                            | <i>NS</i>                                             | 0.03                           | 0.06                              | 0.13                              | 0.03                              | 0.10                              | 0.07                              |
| Agreeableness                           | <b>0.015*</b>                                         | <b>0.27*</b>                   | 0.26                              | 0.12                              | <b>0.56*</b>                      | 0.41                              | 0.13                              |
| Conscientiousness                       | <i>NS</i>                                             | 0.17                           | 0.11                              | 0.05                              | 0.06                              | 0.12                              | 0.06                              |
| Neuroticism                             | <i>NS</i>                                             | 0.08                           | 0.12                              | 0.28                              | 0.20                              | 0.36                              | 0.16                              |
| Openness                                | <i>NS</i>                                             | 0.04                           | 0.27                              | 0.22                              | 0.32                              | 0.19                              | 0.50                              |

352 *\*Indicates significant comparisons,  $p < .05$ ; posthoc tests were not performed for non-significant (NS)*  
 353 *omnibus comparisons.*

354 *Note: Due to the large differences in sample sizes between profiles, Cohen's  $d$  effect sizes were*  
 355 *computed with the Hedges correction to adjust the calculation of the pooled deviation with weights for*  
 356 *the sample sizes.*

357  
 358

359 Table S11. Means and Standard Deviations for Indicator Variables by Latent Profile.

|           | Proportion of<br>left-<br>handedness | Proportion of<br>older brothers | Proportion of<br>Gay/Bisexual<br>Men |
|-----------|--------------------------------------|---------------------------------|--------------------------------------|
| Profile 1 | 0.09 (0.09) <sup>b,c,d</sup>         | 0.17 (0.11) <sup>b,c,d</sup>    | 0.04 (0.07) <sup>d</sup>             |
| Profile 2 | 0.12 (0.11) <sup>a,c,d</sup>         | 0.60 (0.11) <sup>a,c,d</sup>    | 0.04 (0.08) <sup>d</sup>             |
| Profile 3 | 0.81 (0.14) <sup>a,b,d</sup>         | 0.28 (0.23) <sup>a,b</sup>      | 0.05 (0.08) <sup>d</sup>             |
| Profile 4 | 0.37 (0.15) <sup>c,a,b</sup>         | 0.23 (0.13) <sup>a,b</sup>      | 0.55 (0.17) <sup>a,b,c</sup>         |

360 Note: Handedness scores ranged from 0-1, with a score of zero indicating the use of the right hand for  
 361 all tasks on the Edinburgh questionnaire, whereas a score of one indicated use of the left hand for all  
 362 tasks on the Edinburgh questionnaire.

363 <sup>a</sup> Significantly different from Profile 1,  $p < .05$ .

364 <sup>b</sup> Significantly different from Profile 2,  $p < .05$ .

365 <sup>c</sup> Significantly different from Profile 3,  $p < .05$ .

366 <sup>d</sup> Significantly different from Profile 4,  $p < .05$ .

367

368

369

370

Appendix A

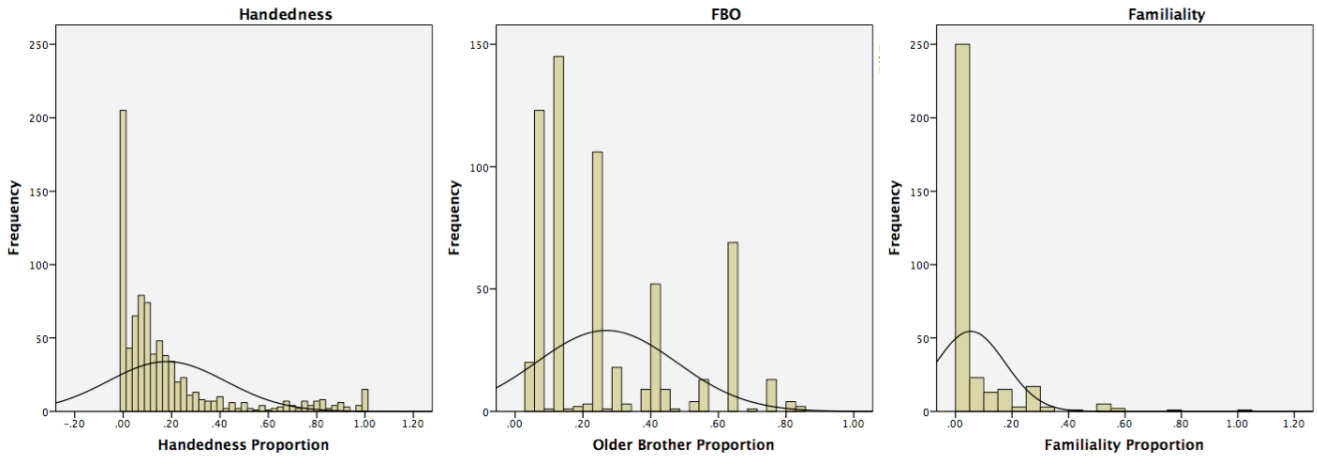

371  
372  
373  
374  
375  
376  
377

Figure S1. *Non-Normality of Biomarkers*. The data from the biomarkers included in the present study are skewed, as would be expected given the low frequencies of these biomarkers in the population. To eliminate the possibility of spurious profile formation, modeling was done with the skew-t distribution in Mplus (see SI “*Non-Normality of Biomarkers*” for further details).

Sexual Orientation

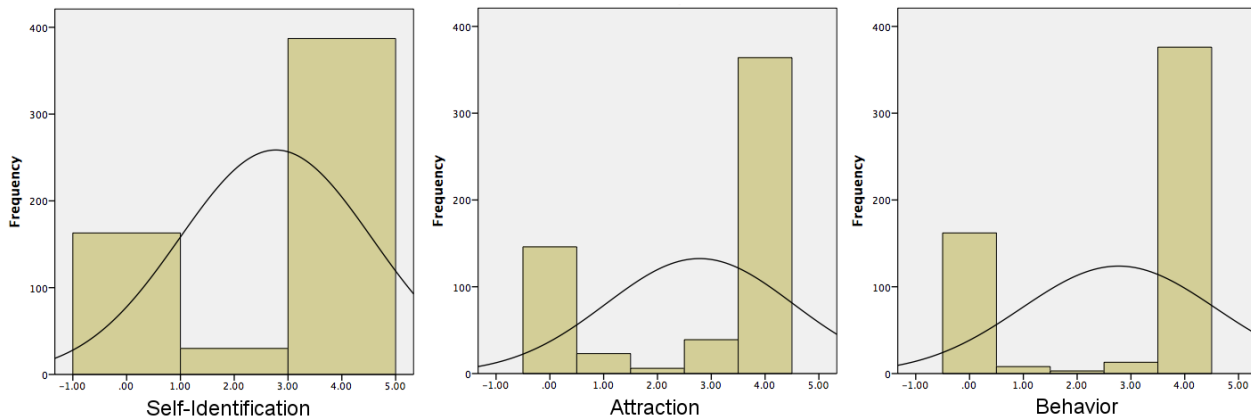

378  
379  
380  
381  
382  
383  
384  
385  
386

Figure S2. *Frequency Distribution of Participants by Sexual Orientation Category*. The distribution of participants based on the 3 classifications of sexual orientation were bimodal. No differences were found between non-exclusive sexual orientations and exclusively same-sex oriented participants; thus, these participants were grouped into one nonheterosexual group for the main analyses (see SI “*Sexual Orientation*” for further details).

387  
388

## Appendix B

```
TITLE:
  LCA study on sexual orientation
  4 class

DATA:
  FILE is /Users/Ashlyn/Desktop/LPA180918.csv;

VARIABLE:
  NAMES are handz oldbroz FamZ IDNumber;

  MISSING are all (999);

  IDVARIABLE = IDnumber;
  USEVAR are  handz oldbroz FamZ;

  CLASSES = c(4);

ANALYSIS:
  type = mixture;
  starts = 1000 500;

OUTPUT:
  TECH1 TECH8 TECH11 TECH14;

SAVEDATA:
  SAVE = cprobabilities;
  FILE is SexualOrientation_4c_zscores_sept2018.dat;
```

389
